# Supplementary material for: Accelerated evaporation of water on graphene oxide
Source: Royal Society of Chemistry journal article supplement (doi:10.1039/c7cp00553a), 2017-01-01
Supplement: c7cp00553a1.pdf [file c7cp00553a1.pdf]

# *Electronic Supporting Information for:*

## **Accelerated evaporation of water on Graphene Oxide**

Rongzheng Wan<sup>1,\*</sup> and Guosheng Shi<sup>1</sup>

<sup>1</sup> Division of Interfacial Water and Key Laboratory of Interfacial Physics and Technology, Shanghai Institute of Applied Physics, Chinese Academy of Sciences, P.O. Box 800-204, Shanghai, 201800, China

\*E-mail: wanrongzheng@sinap.ac.cn

\*Tel.: 021-59554785

### **Content**

#### **Water evaporation on homogeneous GO and patterned GO with SPC/E water model**

The surface tension of TIP3P water model is 52.3 mJ/m<sup>2</sup> at 300K, while the surface tension of SPC/E water model is 63.6 mJ/m<sup>2</sup> at 300K [J. Chem. Phys. 126, 154707]. In order to test the influence of water model with different interfacial tension, we have tried the simulation of water evaporation with water model of SPC/E.

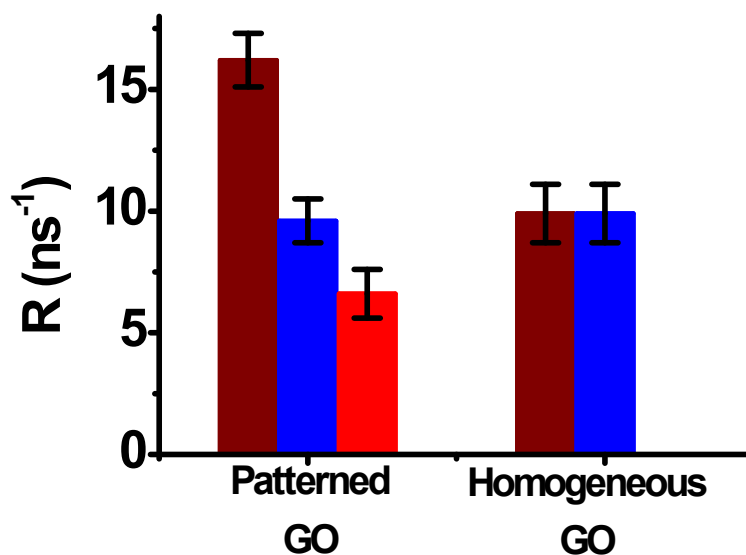

Fig.S11 Evaporation of 9102 SPC/E water molecules on homogeneous GO and patterned GO surface. The brown, blue, and red solid columns represent the total evaporation rate  $R_{total}$ , the evaporation rate  $R_{oxidized}$  from the oxidized region, and the evaporation rate  $R_{unoxidized}$  from the unoxidized region on the homogeneous and patterned GO, respectively.

We have performed new molecular dynamics (MD) simulations on the evaporation of SPC/E water molecules on homogeneous GO and patterned GO surface. As shown in Fig. SI1, for SPC/E water model,  $R_{total}$  for the patterned GO ( $16.2 \text{ ns}^{-1}$ ) is also much larger than  $R_{total}$  on the homogeneous GO ( $9.9 \text{ ns}^{-1}$ ). This accelerated evaporation of water on the patterned GO surface can also be attributed to the slightly decreased  $R_{oxidized}$  of  $9.6 \text{ nm}^{-1}$  and the considerable  $R_{unoxidized}$  of  $6.6 \text{ nm}^{-1}$ . Although the value of evaporation rate is different with different water models, the enhancement of water evaporation on the patterned GO surface and the mechanism behind such phenomena still remain.
